# Supplementary material for: The Africa Phage Forum: A New Collaborative Network for Bacteriophage Research in Africa
Source: Preprints.org preprint supplement (doi:10.20944/preprints202201.0345.v1), 2022-01-24
Supplement: Supplementary file 1 [file supplementary]

# AFRICA PHAGE RESEARCH DATABASE

We invite you to take a little bit of your time and fill this questionnaire. This is with the aim of knowing ourselves and what everyone is involved with with the hope of fostering collaboration. The database will be made available to everyone to encourage collaboration and formation of working groups. Thank you for your time.

---

**\*Required**

1. Email \*

---

2. First Name \*

---

3. Last Name \*

---

4. Institution \*

---

---

---

---

---

## 5. Country \*

Country where your research is based

*Mark only one oval.*

- ☐ Nigeria
- ☐ Kenya
- ☐ Uganda
- ☐ Egypt
- ☐ Ethiopia
- ☐ Tunisia
- ☐ Ghana
- ☐ Other: \_\_\_\_\_

## 6. Career Level \*

*Mark only one oval.*

- ☐ Masters student
- ☐ PhD Student
- ☐ Lecturer/PI
- ☐ Post-Doc
- ☐ Research Scientist
- ☐ Industry Professional
- ☐ Undergraduate

## 7. Do you have knowledge of Phage isolation? \*

*Mark only one oval.*

- ☐ Yes
- ☐ No

8. If yes to the above, which is your level phage research?

If your answer to Do you have knowledge of Phage isolation? is Yes then answer this.

*Mark only one oval.*

- ☐ Characterization
- ☐ Formulation
- ☐ Commercialization
- ☐ Isolation
- ☐ Conceptualization Stage(For those who have not done phage work, kindly in other explain what stage you are)
- ☐ Other: \_\_\_\_\_

9. If No, Would you like to know the procedure/training?

If your answer to Do you have knowledge of Phage isolation? is No then answer this.

*Mark only one oval.*

- ☐ Yes
- ☐ No

10. Are you currently working on Phages?

We would like to know if you are currently working on phages. If yes, Please indicate. If you worked on phages in the past fill answer No.

*Mark only one oval.*

- ☐ Yes
- ☐ No

11. If No, Why did you stop?

If your answer is No to if you are currently working on phages? We would like to know why you stopped working on phages.

\_\_\_\_\_

## 12. What Area of Phage research are you involved in? \*

*Tick all that apply.*

- ☐ Phage use in Bio-control
- ☐ Phage Biology
- ☐ Phage in Agriculture
- ☐ Phage therapy in Human
- ☐ Phage for Diagnosis
- ☐ Phage based vaccines
- ☐ Never done Phage Research

Other: ☐ \_\_\_\_\_

## 13. Which bacterial pathogens are you working on or interested in \*

Please choose as many as possible. The phages you are working on. You may add your phage interest if you can't find it

*Tick all that apply.*

- ☐ ESKAPE (E. faecium, S. aureus, K. pneumoniae, A. baumannii, P. aeruginosa, and E. species) Phages
- ☐ Salmonella typhi
- ☐ Non-typhoidal Salmonella

Other: ☐ \_\_\_\_\_

## 14. Which phages are you working on?

\_\_\_\_\_

## 15. Are you part of any local phage network ? if yes, what is it called

\_\_\_\_\_

## 16. Would you like to be contacted for possible collaboration? \*

*Mark only one oval.*

- ☐ Yes
- ☐ No

17. What type of collaboration/support do you envisage? \*

---

18. Will you be willing to host a student?

*Tick all that apply.*

- ☐ Yes  
☐ No  
☐ Maybe

19. What challenges do you face in phage research? \*

---

---

---

---

---

20. Comments

---

---

---

---

---

---

This content is neither created nor endorsed by Google.

Google Forms
